# Supplementary material for: Strategy to improve the diagnostic efficacy of Bovine Tuberculosis by PCRBIO/DIG-ELISA
Source: Research Square preprint supplement (doi:10.21203/rs.3.rs-7509813/v1), 2025-09-19
Supplement: Supplementary file 1 [file 1fbaa0e252e06bd2732aed83.docx]

**Supplementary Materials**

**Strategy to improve the diagnostic efficacy of bovine tuberculosis by PCRBIO/DIG-ELISA**

Silvia N. Fabianoa,*, Ana Cislaghic, Ana M. Canald, Silvina V. Kergaravata,e, Silvia R. Hernándeza, Adriana R. Soutullob,c,*

a Laboratorio de Sensores y Biosensores (LSB), Facultad de Bioquímica y Ciencias Biológicas; Universidad Nacional del Litoral, 3000 Santa Fe, Argentina.

b Laboratorio de Inmunología Experimental (LIE), Facultad de Bioquímica y Ciencias Biológicas, Universidad Nacional del Litoral, 3000 Santa Fe, Argentina.

c Laboratorio de Diagnóstico e Investigaciones Agropecuarias, Ministerio de la Producción, 3000 Santa Fe, Argentina.

d Cátedra de Patología Veterinaria, Facultad de Ciencias Veterinarias, Universidad Nacional del Litoral, 3080 Esperanza, Santa Fe, Argentina.

e Consejo Nacional de Investigaciones Científicas y Técnicas (CONICET), Predio CONICET “Dr. Alberto Cassano”, 3000 Santa Fe, Argentina.

*Corresponding authors: [adrianasoutullo@gmail.com](mailto:adrianasoutullo@gmail.com), [soutullo@fbcb.unl.edu.ar](mailto:soutullo@fbcb.unl.edu.ar); [sfabiano65@gmail.com](mailto:sfabiano65@gmail.com)

Ana P. Cislaghi. ORCID: <https://orcid.org/0009-0004-4068-3093>

Ana M. Canal. ORCID: <https://orcid.org/0000-0003-4000-5888>

Silvina V. Kergaravat. ORCID: <https://orcid.org/0000-0002-9765-6860>

Silvia R. Hernández. ORCID: <https://orcid.org/0000-0001-5371-3715>

Adriana R. Soutullo. ORCID: <https://orcid.org/0000-0001-5343-2067>

Silvia N. Fabiano, SNF, [sfabiano65@gmail.com](mailto:sfabiano65@gmail.com)

Ana P. Cislaghi, APC, [anapcislaghi@gmail.com](mailto:anapcislaghi@gmail.com)

Ana M. Canal, AMC, [acanal@fcv.unl.edu.ar](mailto:acanal@fcv.unl.edu.ar)

Silvina V. Kergaravat, SVK, [skergaravat@fbcb.unl.edu.ar](mailto:skergaravat@fbcb.unl.edu.ar)

Silvia R. Hernández, SRH, [shernand@fbcb.unl.edu.ar](mailto:shernand@fbcb.unl.edu.ar)

Adriana R. Soutullo, ARS, [soutullo@fbcb.unl.edu.ar](mailto:soutullo@fbcb.unl.edu.ar)

**
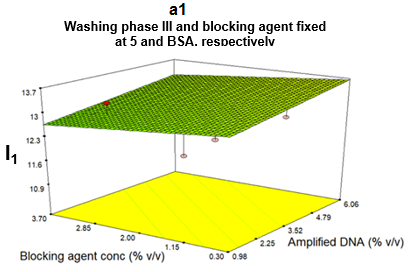
**

**
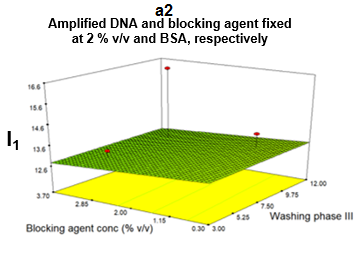
**


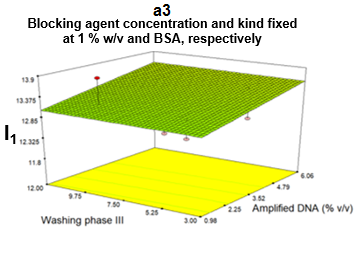


**Fig. S1** 3D graphs of the two studied factors vs. the I1 index calculated from PCRBIO/DIG-ELISA responses. (a1) Blocking agent concentration and amplified DNA, maintaining washing phase III and kind of blocking agent fixed at 5 and BSA, respectively; (a2) blocking agent concentration and washing phase III, maintaining amplified DNA and kind of blocking agent fixed at 2 % v/v and BSA, respectively; (a3) washing phase III and amplified DNA, maintaining blocking agent concentration and kind of blocking agent fixed at 1 % w/v and BSA, respectively


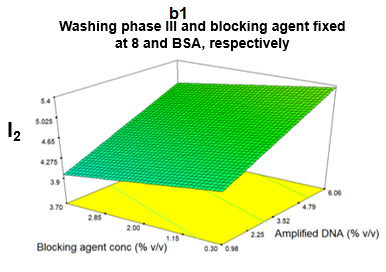


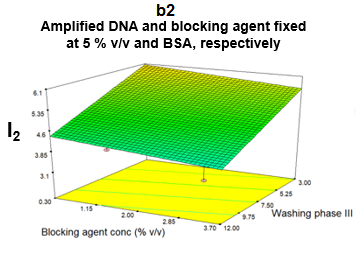


**
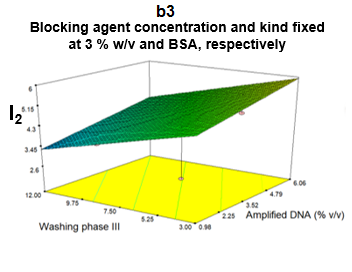
**

**Fig. S2** 3D graphs of the two studied factors vs. the I2 index calculated from PCRBIO/DIG-ELISA responses. (b1) Blocking agent concentration and amplified DNA, maintaining washing phase III and kind of blocking agent fixed at 8 and BSA, respectively; (b2) blocking agent concentration and washing phase III, maintaining amplified DNA and kind of blocking agent fixed at 5 % v/v and BSA, respectively; (b3) washing phase III and amplified DNA, maintaining blocking agent concentration and kind of blocking agent fixed at 3 % w/v and BSA, respectively
